# Supplementary material for: Fine-tuning water exchange on GdIII poly(amino carboxylates) by modulation of steric crowding
Source: Royal Society of Chemistry journal article supplement (doi:10.1039/b506702b), 2005-01-01
Supplement: b506702b.pdf [file b506702b.pdf]

Supporting Information for

## Fine-tuning water exchange on Gd<sup>III</sup> poly(amino carboxylates) by modulation of steric crowding

Zoltán Jászberényi, Angélique Sour, Éva Tóth, Meriem Benmelouka and André E. Merbach\*

Laboratoire de Chimie Inorganique et Bioinorganique, Ecole Polytechnique Fédérale de Lausanne, ISIC, BCH  
CH-1015, Lausanne, Switzerland. Fax: 41 21 693 9875; Tel: 41 21 693 9871; E-mail: [andre.merbach@epfl.ch](mailto:andre.merbach@epfl.ch)

**Table S1.** Variable temperature reduced transverse and longitudinal <sup>17</sup>O relaxation rates and chemical shifts of [Gd(DTTA-Nprop)(H<sub>2</sub>O)]<sup>2-</sup> solution at 9.4T.

**Table S2.** Variable temperature reduced transverse and longitudinal <sup>17</sup>O relaxation rates and chemical shifts of [Gd(EPTPA-BAA)(H<sub>2</sub>O)] solution at 9.4T.

**Table S3.** Variable temperature reduced transverse and longitudinal <sup>17</sup>O relaxation rates and chemical shifts of [Gd(DO3A-Nprop)(H<sub>2</sub>O)] solution at 9.4T.

**Table S4.** EPR spectral data of [Gd(DTTA-Nprop)(H<sub>2</sub>O)]<sup>2-</sup> at X, Q and W band

**Table S5.** EPR spectral data of [Gd(EPTPA-BAA)(H<sub>2</sub>O)] at X, Q and W band

**Table S6.** Proton relaxivities ( $r_1$ ; mM<sup>-1</sup>s<sup>-1</sup>) of [Gd(DTTA-Nprop)(H<sub>2</sub>O)]<sup>2-</sup>

**Table S7.** Proton relaxivities ( $r_1$ ; mM<sup>-1</sup>s<sup>-1</sup>) of [Gd(EPTPA-BAA)(H<sub>2</sub>O)]

**Figure S1.** Temperature dependence of reduced <sup>17</sup>O transverse (●), longitudinal (■) relaxation rates (a), reduced chemical shifts (b) at 9.4 T; proton relaxivities at 5.1°C (▼), 25.0°C (●), 37.1 °C (■) and 49.7 °C (◆) (c); EPR peak-to-peak line widths (d) and the apparent g-factor (e) at 9.4 GHz (●), 35 GHz (■) and 94 GHz (▼-measured, ◆-calculated) for [Gd(EPTPA-BAA)(H<sub>2</sub>O)].

**Figure S2.** Temperature dependence of reduced <sup>17</sup>O transverse (●), longitudinal (■) relaxation rates (a) and reduced chemical shifts (b) at 9.4 T for [Gd(DO3A-Nprop)(H<sub>2</sub>O)]

**Appendix** Equations used to analyse the <sup>17</sup>O NMR, NMRD and EPR data.

**Table S1.** Variable temperature reduced transverse and longitudinal  $^{17}\text{O}$  relaxation rates and chemical shifts of  $[\text{Gd}(\text{DTTA-Nprop})(\text{H}_2\text{O})]^{2-}$  solution at 9.4T.

| $T/\text{K}$ | $1000/T/\text{K}^{-1}$ | $P_m$    | $T_1/\text{s}(\text{ref})$ | $T_1/\text{s}$ | $\ln(1/T_{1r})$ | $T_2/\text{s}(\text{ref})$ | $T_2/\text{s}$ | $\ln(1/T_{2r})$ | $\nu_{\text{ref}}/\text{Hz}$ | $\nu_{\text{sample}}/\text{Hz}$ | $\Delta\omega_r/\text{rad s}^{-1}$ |
|--------------|------------------------|----------|----------------------------|----------------|-----------------|----------------------------|----------------|-----------------|------------------------------|---------------------------------|------------------------------------|
| 277          | 3.61                   | 8.12E-04 | 3.67E-03                   | 3.14E-03       | 10.95           | 3.70E-03                   | 7.10E-04       | 14.15           | 491.46                       | 387.97                          | -8.01E+05                          |
| 288          | 3.47                   | 8.12E-04 | 5.47E-03                   | 4.71E-03       | 10.50           | 5.53E-03                   | 1.01E-03       | 13.81           | 462.27                       | 350.82                          | -8.63E+05                          |
| 300          | 3.33                   | 8.12E-04 | 7.56E-03                   | 6.62E-03       | 10.05           | 7.59E-03                   | 1.46E-03       | 13.43           | 544.54                       | 441.04                          | -8.01E+05                          |
| 312          | 3.20                   | 8.12E-04 | 1.00E-02                   | 8.79E-03       | 9.76            | 1.00E-02                   | 1.89E-03       | 13.18           | 515.35                       | 414.5                           | -7.81E+05                          |
| 324          | 3.08                   | 8.12E-04 | 1.28E-02                   | 1.13E-02       | 9.46            | 1.28E-02                   | 2.42E-03       | 12.93           | 390.63                       | 284.48                          | -8.22E+05                          |
| 335          | 2.99                   | 8.12E-04 | 1.56E-02                   | 1.39E-02       | 9.18            | 1.56E-02                   | 3.04E-03       | 12.69           | 364.09                       | 263.25                          | -7.81E+05                          |
| 346          | 2.89                   | 8.12E-04 | 1.89E-02                   | 1.68E-02       | 9.04            | 1.89E-02                   | 4.00E-03       | 12.40           | 332.25                       | 236.71                          | -7.40E+05                          |
| 358          | 2.80                   | 8.12E-04 | 2.25E-02                   | 2.01E-02       | 8.78            | 2.24E-02                   | 5.46E-03       | 12.05           | 303.06                       | 212.83                          | -6.98E+05                          |
| 371          | 2.70                   | 8.12E-04 | 2.69E-02                   | 2.42E-02       | 8.54            | 2.68E-02                   | 7.85E-03       | 11.62           | 257.93                       | 175.67                          | -6.37E+05                          |

**Table S2.** Variable temperature reduced transverse and longitudinal  $^{17}\text{O}$  relaxation rates and chemical shifts of  $[\text{Gd}(\text{EPTPA-BAA})(\text{H}_2\text{O})]$  solution at 9.4T.

| $T/\text{K}$ | $1000/T/\text{K}^{-1}$ | $P_m$    | $T_1/\text{s}(\text{ref})$ | $T_1/\text{s}$ | $\ln(1/T_{1r})$ | $T_2/\text{s}(\text{ref})$ | $T_2/\text{s}$ | $\ln(1/T_{2r})$ | $\nu_{\text{ref}}/\text{Hz}$ | $\nu_{\text{sample}}/\text{Hz}$ | $\Delta\omega_r/\text{rad s}^{-1}$ |
|--------------|------------------------|----------|----------------------------|----------------|-----------------|----------------------------|----------------|-----------------|------------------------------|---------------------------------|------------------------------------|
| 277          | 3.61                   | 6.97E-04 | 3.67E-03                   | 3.04E-03       | 11.30           | 3.70E-03                   | 6.79E-04       | 14.36           | 491.46                       | 407.81                          | -7.54E+05                          |
| 288          | 3.47                   | 6.97E-04 | 5.47E-03                   | 4.65E-03       | 10.74           | 5.53E-03                   | 8.64E-04       | 14.15           | 462.27                       | 374.69                          | -7.90E+05                          |
| 300          | 3.33                   | 6.97E-04 | 7.56E-03                   | 6.47E-03       | 10.38           | 7.59E-03                   | 1.19E-03       | 13.83           | 544.54                       | 449                             | -8.62E+05                          |
| 312          | 3.20                   | 6.97E-04 | 1.00E-02                   | 8.63E-03       | 10.05           | 1.00E-02                   | 1.66E-03       | 13.49           | 515.35                       | 422.46                          | -8.38E+05                          |
| 324          | 3.08                   | 6.97E-04 | 1.28E-02                   | 1.12E-02       | 9.69            | 1.28E-02                   | 2.42E-03       | 13.08           | 390.63                       | 297.74                          | -8.38E+05                          |
| 335          | 2.99                   | 6.97E-04 | 1.56E-02                   | 1.38E-02       | 9.41            | 1.56E-02                   | 3.47E-03       | 12.68           | 364.09                       | 273.86                          | -8.14E+05                          |
| 346          | 2.89                   | 6.97E-04 | 1.89E-02                   | 1.67E-02       | 9.21            | 1.89E-02                   | 5.08E-03       | 12.24           | 332.25                       | 247.32                          | -7.66E+05                          |
| 358          | 2.80                   | 6.97E-04 | 2.25E-02                   | 2.01E-02       | 8.96            | 2.24E-02                   | 7.27E-03       | 11.80           | 303.06                       | 220.78                          | -7.42E+05                          |
| 371          | 2.70                   | 6.97E-04 | 2.69E-02                   | 2.40E-02       | 8.77            | 2.68E-02                   | 1.06E-02       | 11.31           | 257.93                       | 183.63                          | -6.70E+05                          |

**Table S3.** Variable temperature reduced transverse and longitudinal  $^{17}\text{O}$  relaxation rates and chemical shifts of  $[\text{Gd}(\text{DO3A-Nprop})(\text{H}_2\text{O})]^-$  solution at 9.4T.

| $T/\text{K}$ | $1000/T/\text{K}^{-1}$ | $P_m$    | $T_1/\text{s}(\text{ref})$ | $T_1/\text{s}$ | $\ln(1/T_{1r})$ | $T_2/\text{s}(\text{ref})$ | $T_2/\text{s}$ | $\ln(1/T_{2r})$ | $\nu_{\text{ref}}/\text{Hz}$ | $\nu_{\text{sample}}/\text{Hz}$ | $\Delta\omega_r/\text{rad s}^{-1}$ |
|--------------|------------------------|----------|----------------------------|----------------|-----------------|----------------------------|----------------|-----------------|------------------------------|---------------------------------|------------------------------------|
| 304          | 3.28                   | 4.36E-04 | 8.24E-03                   | 7.49E-03       | 10.23           | 8.54E-03                   | 3.13E-03       | 13.05           | 454.5                        | 403.2                           | -7.39E+05                          |
| 318          | 3.14                   | 4.36E-04 | 1.15E-02                   | 1.07E-02       | 9.63            | 1.15E-02                   | 4.81E-03       | 12.53           | 415.7                        | 364.6                           | -7.36E+05                          |
| 333          | 3.00                   | 4.36E-04 | 1.50E-02                   | 1.43E-02       | 8.93            | 1.53E-02                   | 7.76E-03       | 11.89           | 377.0                        | 330                             | -6.77E+05                          |
| 362          | 2.76                   | 4.36E-04 | 2.38E-02                   | 2.25E-02       | 8.61            | 2.38E-02                   | 1.62E-02       | 10.71           | 307.3                        | 266.7                           | -5.85E+05                          |
| 348          | 2.87                   | 4.36E-04 | 2.05E-02                   | 1.92E-02       | 8.93            | 1.94E-02                   | 1.15E-02       | 11.31           | 341.0                        | 296                             | -6.48E+05                          |
| 274          | 3.65                   | 4.36E-04 | 3.26E-03                   | 3.01E-03       | 10.98           | 3.35E-03                   | 1.17E-03       | 14.06           | 535.4                        | 479                             | -8.12E+05                          |
| 288          | 3.47                   | 4.36E-04 | 5.40E-03                   | 5.03E-03       | 10.35           | 5.45E-03                   | 1.46E-03       | 13.95           | 492.1                        | 434.25                          | -8.33E+05                          |

**Table S4.** EPR spectral data of  $[\text{Gd}(\text{DTTA-Nprop})(\text{H}_2\text{O})]^{2-}$  at X, Q and W band

| $T/\text{K}$ | $1000/T/\text{K}^{-1}$ | EPR freq. (GHz) | $\Delta H_{p/p}/\text{G}$ | $B_0/\text{G}$ |
|--------------|------------------------|-----------------|---------------------------|----------------|
| 278.15       | 3.60                   | 9.4365          | 196.8                     | 3426.2         |
| 298.15       | 3.35                   | 9.4345          | 171.0                     | 3423.7         |
| 309.85       | 3.23                   | 9.4340          | 174.0                     | 3418.7         |
| 329.45       | 3.04                   | 9.4336          | 190.2                     | 3411.2         |
| 276.65       | 3.61                   | 34.1870         | 54.7                      | 12271.4        |
| 298.65       | 3.35                   | 34.0990         | 53.8                      | 12250.9        |
| 311.95       | 3.21                   | 34.1860         | 52.8                      | 12278.3        |
| 322.55       | 3.10                   | 34.1850         | 51.7                      | 12280.2        |
| 286.70       | 3.49                   | 94.2027         | 26.9                      | 33798.4        |

**Table S5.** EPR spectral data of  $[\text{Gd}(\text{EPTPA-BAA})(\text{H}_2\text{O})]$  at X, Q and W band

| $T/\text{K}$ | $1000/T/\text{K}^{-1}$ | EPR freq. (GHz) | $\Delta H_{p/p}/\text{G}$ | $B_0/\text{G}$ |
|--------------|------------------------|-----------------|---------------------------|----------------|
| 278.15       | 3.60                   | 9.4375          | 404.1                     | 3426.2         |
| 298.15       | 3.35                   | 9.4374          | 368.0                     | 3418.0         |
| 309.85       | 3.23                   | 9.4357          | 369.1                     | 3406.3         |
| 329.45       | 3.04                   | 9.4368          | 394.2                     | 3393.8         |
| 276.65       | 3.61                   | 34.1860         | 63.6                      | 12284.1        |
| 298.65       | 3.35                   | 34.0950         | 63.5                      | 12263.6        |
| 311.95       | 3.21                   | 34.1820         | 64.5                      | 12292.9        |
| 322.55       | 3.10                   | 34.1850         | 75.2                      | 12292.9        |
| 286.70       | 3.49                   | 94.1913         | 34.2                      | 33811.1        |

**Table S6.** Proton relaxivities ( $r_1$ ; mM<sup>-1</sup>s<sup>-1</sup>) of [Gd(DTTA-Nprop)(H<sub>2</sub>O)]<sup>2-</sup>

| Frequency / MHz | $r_1$ (mM <sup>-1</sup> s <sup>-1</sup> )<br>278 K | Frequency / MHz | $r_1$ (mM <sup>-1</sup> s <sup>-1</sup> )<br>298 K | Frequency / MHz | $r_1$ (mM <sup>-1</sup> s <sup>-1</sup> )<br>310 K | Frequency / MHz | $r_1$ (mM <sup>-1</sup> s <sup>-1</sup> )<br>323 K |
|-----------------|----------------------------------------------------|-----------------|----------------------------------------------------|-----------------|----------------------------------------------------|-----------------|----------------------------------------------------|
| 200.0           | 7.69                                               | 200.0           | 4.78                                               | 200.0           | 3.68                                               | 200.0           | 2.84                                               |
| 100.0           | 8.32                                               | 100.0           | 4.83                                               | 100.0           | 3.73                                               | 100.0           | 2.87                                               |
| 60.0            | 8.71                                               | 60.0            | 5.01                                               | 60.0            | 3.81                                               | 60.0            | 2.92                                               |
| 50.0            | 8.11                                               | 50.0            | 5.05                                               | 50.0            | 3.93                                               | 50.0            | 3.05                                               |
| 40.0            | 8.57                                               | 40.0            | 5.18                                               | 40.0            | 3.92                                               | 40.0            | 3.12                                               |
| 30.0            | 8.44                                               | 30.0            | 5.22                                               | 30.0            | 4.04                                               | 30.0            | 3.27                                               |
| 19.9980         | 8.95                                               | 19.9980         | 5.41                                               | 19.9980         | 4.33                                               | 19.9980         | 3.63                                               |
| 18.0020         | 8.93                                               | 18.0020         | 5.54                                               | 18.0020         | 4.47                                               | 18.0020         | 3.80                                               |
| 15.9980         | 9.12                                               | 15.9980         | 5.62                                               | 15.9980         | 4.65                                               | 15.9980         | 3.93                                               |
| 13.9980         | 9.30                                               | 13.9980         | 5.78                                               | 13.9980         | 4.71                                               | 13.9980         | 4.08                                               |
| 12.0000         | 9.33                                               | 12.0000         | 6.27                                               | 12.0000         | 4.86                                               | 12.0000         | 4.36                                               |
| 10.0010         | 9.69                                               | 10.0010         | 6.58                                               | 10.0010         | 5.38                                               | 10.0010         | 4.67                                               |
| 6.9516          | 10.68                                              | 6.9516          | 7.21                                               | 6.9516          | 6.02                                               | 6.9516          | 5.18                                               |
| 4.8342          | 11.28                                              | 4.8342          | 7.89                                               | 4.8342          | 6.99                                               | 4.8342          | 5.92                                               |
| 3.3593          | 12.18                                              | 3.3593          | 8.44                                               | 3.3593          | 7.21                                               | 3.3593          | 6.05                                               |
| 2.3350          | 12.98                                              | 2.3350          | 8.95                                               | 2.3350          | 7.46                                               | 2.3350          | 6.37                                               |
| 1.6231          | 13.32                                              | 1.6231          | 9.12                                               | 1.6231          | 7.92                                               | 1.6231          | 6.58                                               |
| 1.1293          | 13.51                                              | 1.1293          | 9.52                                               | 1.1293          | 7.75                                               | 1.1293          | 6.60                                               |
| 0.7843          | 13.73                                              | 0.7843          | 9.45                                               | 0.7843          | 8.12                                               | 0.7843          | 6.64                                               |
| 0.5452          | 13.82                                              | 0.5452          | 9.56                                               | 0.5452          | 8.24                                               | 0.5452          | 6.84                                               |
| 0.3790          | 14.04                                              | 0.3790          | 9.59                                               | 0.3790          | 8.20                                               | 0.3790          | 6.76                                               |
| 0.2638          | 13.92                                              | 0.2638          | 9.78                                               | 0.2638          | 8.40                                               | 0.2638          | 6.74                                               |
| 0.1833          | 13.86                                              | 0.1833          | 9.77                                               | 0.1833          | 8.31                                               | 0.1833          | 6.66                                               |
| 0.1272          | 14.21                                              | 0.1272          | 9.53                                               | 0.1272          | 8.28                                               | 0.1272          | 6.69                                               |
| 0.0885          | 13.79                                              | 0.0885          | 9.82                                               | 0.0885          | 8.34                                               | 0.0885          | 6.60                                               |
| 0.0615          | 13.87                                              | 0.0615          | 9.82                                               | 0.0615          | 8.11                                               | 0.0615          | 6.76                                               |
| 0.0429          | 14.00                                              | 0.0429          | 9.72                                               | 0.0429          | 8.39                                               | 0.0429          | 6.80                                               |
| 0.0297          | 13.84                                              | 0.0297          | 9.84                                               | 0.0297          | 8.14                                               | 0.0297          | 6.74                                               |
| 0.0208          | 13.91                                              | 0.0208          | 9.73                                               | 0.0208          | 8.10                                               | 0.0208          | 6.97                                               |
| 0.0143          | 13.95                                              | 0.0143          | 9.89                                               | 0.0143          | 8.42                                               | 0.0143          | 6.86                                               |
| 0.0100          | 14.10                                              | 0.0100          | 9.89                                               | 0.0100          | 8.38                                               | 0.0100          | 6.89                                               |

**Table S7.** Proton relaxivities ( $r_1$ ;  $\text{mM}^{-1}\text{s}^{-1}$ ) of  $[\text{Gd}(\text{EPTPA-BAA})(\text{H}_2\text{O})]$

| Frequency / MHz | $r_1$ ( $\text{mM}^{-1}\text{s}^{-1}$ )<br>278 K | Frequency / MHz | $r_1$ ( $\text{mM}^{-1}\text{s}^{-1}$ )<br>298 K | Frequency / MHz | $r_1$ ( $\text{mM}^{-1}\text{s}^{-1}$ )<br>310 K | Frequency / MHz | $r_1$ ( $\text{mM}^{-1}\text{s}^{-1}$ )<br>323 K |
|-----------------|--------------------------------------------------|-----------------|--------------------------------------------------|-----------------|--------------------------------------------------|-----------------|--------------------------------------------------|
| 200.0           | 10.17                                            | 200.0           | 6.08                                             | 200.0           | 4.59                                             | 200.0           | 3.38                                             |
| 100.0           | 11.54                                            | 100.0           | 6.20                                             | 100.0           | 4.65                                             | 100.0           | 3.50                                             |
| 60.0            | 12.15                                            | 60.0            | 6.48                                             | 60.0            | 4.72                                             | 60.0            | 3.57                                             |
| 50.0            | 11.50                                            | 50.0            | 6.51                                             | 50.0            | 4.79                                             | 50.0            | 3.66                                             |
| 40.0            | 12.31                                            | 40.0            | 6.67                                             | 40.0            | 4.84                                             | 40.0            | 3.75                                             |
| 30.0            | 11.86                                            | 30.0            | 6.68                                             | 30.0            | 4.94                                             | 30.0            | 3.86                                             |
| 19.9980         | 12.11                                            | 19.9980         | 6.65                                             | 19.9980         | 4.91                                             | 19.9980         | 4.09                                             |
| 18.0020         | 12.08                                            | 18.0020         | 6.68                                             | 18.0020         | 5.08                                             | 18.0020         | 4.16                                             |
| 15.9980         | 12.19                                            | 15.9980         | 6.85                                             | 15.9980         | 5.12                                             | 15.9980         | 4.24                                             |
| 13.9980         | 12.28                                            | 13.9980         | 6.88                                             | 13.9980         | 5.42                                             | 13.9980         | 4.42                                             |
| 12.0000         | 12.51                                            | 12.0000         | 7.16                                             | 12.0000         | 5.57                                             | 12.0000         | 4.64                                             |
| 10.0010         | 12.65                                            | 10.0010         | 7.34                                             | 10.0010         | 5.81                                             | 10.0010         | 4.97                                             |
| 6.9516          | 13.04                                            | 6.9516          | 7.66                                             | 6.9516          | 6.26                                             | 6.9516          | 5.74                                             |
| 4.8342          | 14.59                                            | 4.8342          | 8.54                                             | 4.8342          | 6.82                                             | 4.8342          | 6.42                                             |
| 3.3593          | 14.77                                            | 3.3593          | 10.08                                            | 3.3593          | 7.04                                             | 3.3593          | 6.81                                             |
| 2.3350          | 15.38                                            | 2.3350          | 10.52                                            | 2.3350          | 7.28                                             | 2.3350          | 7.29                                             |
| 1.6231          | 16.85                                            | 1.6231          | 11.42                                            | 1.6231          | 7.99                                             | 1.6231          | 7.71                                             |
| 1.1293          | 17.57                                            | 1.1293          | 11.64                                            | 1.1293          | 7.57                                             | 1.1293          | 7.78                                             |
| 0.7843          | 17.67                                            | 0.7843          | 11.98                                            | 0.7843          | 7.92                                             | 0.7843          | 7.91                                             |
| 0.5452          | 18.01                                            | 0.5452          | 12.02                                            | 0.5452          | 8.04                                             | 0.5452          | 7.89                                             |
| 0.3790          | 18.43                                            | 0.3790          | 12.05                                            | 0.3790          | 8.00                                             | 0.3790          | 8.07                                             |
| 0.2638          | 17.97                                            | 0.2638          | 12.04                                            | 0.2638          | 8.20                                             | 0.2638          | 8.04                                             |
| 0.1833          | 18.32                                            | 0.1833          | 12.33                                            | 0.1833          | 8.11                                             | 0.1833          | 8.02                                             |
| 0.1272          | 18.25                                            | 0.1272          | 12.25                                            | 0.1272          | 8.08                                             | 0.1272          | 8.12                                             |
| 0.0885          | 18.37                                            | 0.0885          | 12.15                                            | 0.0885          | 8.14                                             | 0.0885          | 8.10                                             |
| 0.0615          | 18.34                                            | 0.0615          | 12.11                                            | 0.0615          | 7.92                                             | 0.0615          | 8.01                                             |
| 0.0429          | 18.24                                            | 0.0429          | 12.16                                            | 0.0429          | 8.18                                             | 0.0429          | 8.19                                             |
| 0.0297          | 18.04                                            | 0.0297          | 12.23                                            | 0.0297          | 7.94                                             | 0.0297          | 7.99                                             |
| 0.0208          | 18.27                                            | 0.0208          | 12.12                                            | 0.0208          | 7.91                                             | 0.0208          | 8.21                                             |
| 0.0143          | 18.17                                            | 0.0143          | 12.11                                            | 0.0143          | 8.22                                             | 0.0143          | 8.08                                             |
| 0.0100          | 18.01                                            | 0.0100          | 12.19                                            | 0.0100          | 8.18                                             | 0.0100          | 8.06                                             |

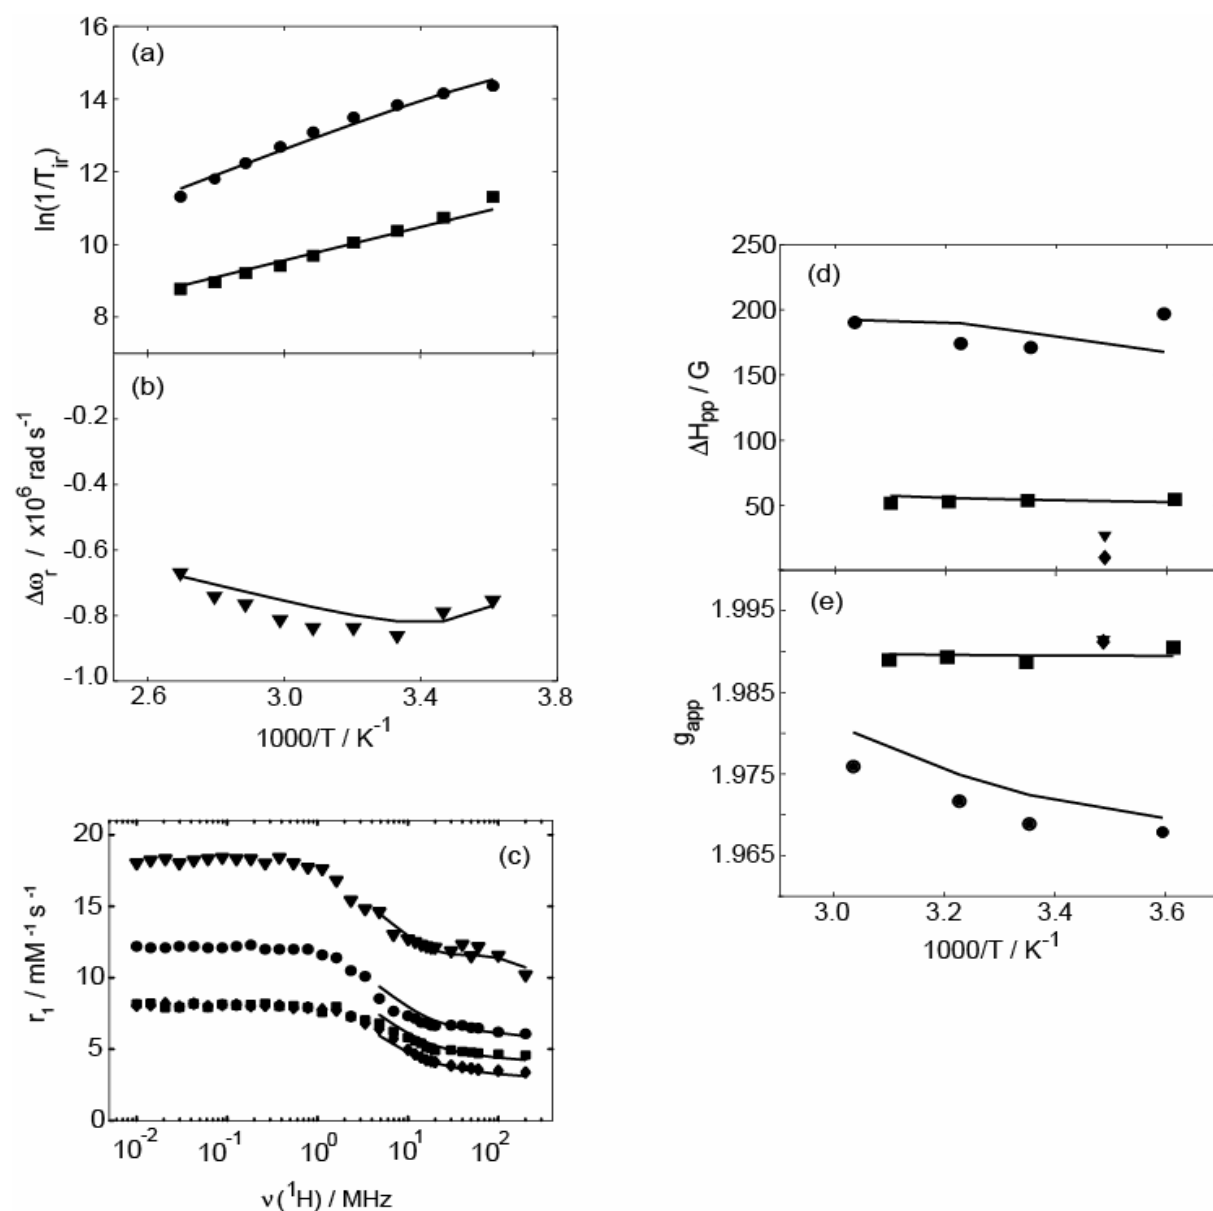

**Figure S1.** Temperature dependence of reduced <sup>17</sup>O transverse (●), longitudinal (■) relaxation rates (a), reduced chemical shifts (b) at 9.4 T; proton relaxivities at 5.1°C (▼), 25.0°C (●), 37.1 °C (■) and 49.7 °C (◆) (c); EPR peak-to-peak line widths (d) and the apparent g-factor (e) at 9.4 GHz (●), 35 GHz (■) and 94 GHz (▼-measured, ◆-calculated) for [Gd(EPTPA-BAA)(H<sub>2</sub>O)].

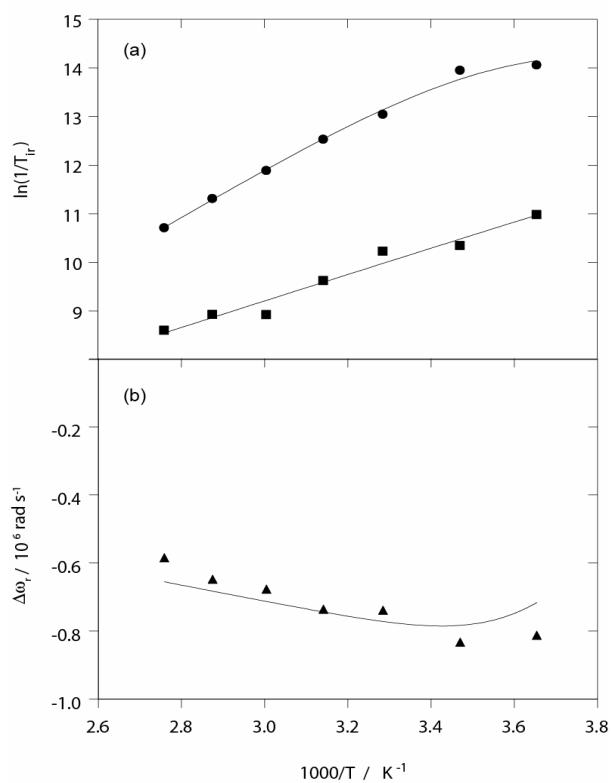

**Figure S2.** Temperature dependence of reduced  $^{17}\text{O}$  transverse (●), longitudinal (■) relaxation rates (a) and reduced chemical shifts (b) at 9.4 T for  $[\text{Gd}(\text{DO3A-Nprop})(\text{H}_2\text{O})]$



## Appendix

### *Solomon-Bloembergen-Morgan theory of paramagnetic relaxation enhancement*

<sup>17</sup>O NMR. From the measured <sup>17</sup>O NMR relaxation rates and angular frequencies of the paramagnetic solutions,  $1/T_1$ ,  $1/T_2$  and  $\omega$ , and of the reference,  $1/T_{1A}$ ,  $1/T_{2A}$  and  $\omega_A$ , one can calculate the reduced relaxation rates and chemical shift,  $1/T_{1r}$ ,  $1/T_{2r}$  and  $\omega_r$ , (Equations (1-3)), where  $P_m$  is the molar fraction of bound water,  $1/T_{1m}$ ,  $1/T_{2m}$  are the relaxation rates of the bound water and  $\Delta\omega_m$  is the chemical shift difference between bound and bulk water.

$$\frac{1}{T_{1r}} = \frac{1}{P_m} \left[ \frac{1}{T_1} - \frac{1}{T_{1A}} \right] = \frac{1}{T_{1m} + \tau_m} \quad (1)$$

$$\frac{1}{T_{2r}} = \frac{1}{P_m} \left[ \frac{1}{T_2} - \frac{1}{T_{2A}} \right] = \frac{1}{\tau_m} \frac{T_{2m}^{-2} + \tau_m^{-1} T_{2m}^{-1} + \Delta\omega_m^2}{(\tau_m^{-1} + T_{2m}^{-1})^2 + \Delta\omega_m^2} \quad (2)$$

$$\Delta\omega_r = \frac{1}{P_m} (\omega - \omega_A) = \frac{\Delta\omega_m}{(1 + \tau_m T_{2m}^{-1})^2 + \tau_m^2 \Delta\omega_m^2} + \Delta\omega_{os} \quad (3)$$

$\Delta\omega_m$  is determined by the hyperfine or scalar coupling constant,  $A/\hbar$ , (Equation (4)), where  $B$  represents the magnetic field,  $S$  is the electron spin and  $g_L$  is the isotropic Landé  $g$  factor.

$$\Delta\omega_m = \frac{g_L \mu_B S(S+1) B A}{3k_B T \hbar} \quad (4)$$

The outer sphere contribution to the chemical shift is assumed to be linearly related to  $\Delta\omega_m$  by a constant  $C_{os}$  (Eq. (5))

$$\Delta\omega_{os} = C_{os} \Delta\omega_m \quad (5)$$

The <sup>17</sup>O longitudinal relaxation rates are given by Equation (6), where  $\gamma_S$  is the electron and  $\gamma_I$  is the nuclear gyromagnetic ratio ( $\gamma_S = 1.76 \times 10^{11} \text{ rad s}^{-1} \text{ T}^{-1}$ ,  $\gamma_I = -3.626 \times 10^7 \text{ rad s}^{-1} \text{ T}^{-1}$ ),  $r$  is the effective distance between the electron charge and the <sup>17</sup>O nucleus,  $I$  is the nuclear spin (5/2 for <sup>17</sup>O),  $\chi$  is the quadrupolar coupling constant and  $\eta$  is an asymmetry parameter:

$$\frac{1}{T_{1m}} = \left[ \frac{1}{15} \left( \frac{\mu_0}{4\pi} \right)^2 \frac{\hbar^2 \gamma_I^2 \gamma_S^2}{r_{GdO}^6} S(S+1) \right] \times \left[ 6\tau_{d1} + 14 \frac{\tau_{d2}}{1 + \omega_S^2 \tau_{d2}^2} \right] + \frac{3\pi^2}{10} \frac{2I+3}{I^2(2I-1)} \chi^2 (1 + \eta^2/3) \tau_{RO} \quad (6)$$

$$\frac{1}{\tau_{di}} = \frac{1}{\tau_m} + \frac{1}{\tau_{RO}} + \frac{1}{T_{ie}} \quad i = 1, 2 \quad (7)$$

The  $\tau_{RO}$  overall rotational correlation time is assumed to have a simple exponential temperature dependence with an  $E_R$  activation energy as follows:

$$\tau_{RO} = \tau_{RO}^{298} \exp\left\{\frac{E_R}{R}\left(\frac{1}{T} - \frac{1}{298.15}\right)\right\} \quad (8)$$

In the transverse relaxation the scalar contribution,  $1/T_{2sc}$ , is the most important [Eq. (9)].  $1/\tau_{s1}$  is the sum of the exchange rate constant and the electron spin relaxation rate.

$$\frac{1}{T_{2m}} \cong \frac{1}{T_{2sc}} = \frac{S(S+1)}{3} \left(\frac{A}{\hbar}\right)^2 \tau_{s1} \quad (9)$$

$$\frac{1}{\tau_{s1}} = \frac{1}{\tau_m} + \frac{1}{T_{1e}} \quad (10)$$

The inverse binding time (or exchange rate,  $k_{ex}$ ) of water molecules in the inner sphere is assumed to obey the Eyring equation [Eq. (11)], where  $\Delta S^\ddagger$  and  $\Delta H^\ddagger$  are the entropy and enthalpy of activation for the exchange, and  $k_{ex}^{298}$  is the exchange rate at 298.15 K.

$$\frac{1}{\tau_m} = k_{ex} = \frac{k_B T}{h} \exp\left\{\frac{\Delta S^\ddagger}{R} - \frac{\Delta H^\ddagger}{RT}\right\} = \frac{k_{ex}^{298} T}{298.15} \exp\left\{\frac{\Delta H^\ddagger}{R}\left(\frac{1}{298.15} - \frac{1}{T}\right)\right\} \quad (11)$$

In the fit of  $^{17}O$  NMR data on  $[Gd(DO3A-Nprop)(H_2O)]^-$ , the electron spin relaxation has been described as in the traditional SBM theory. Here, the electron spin relaxation rates,  $1/T_{1e}$  and  $1/T_{2e}$  for metal ions in solution with  $S > 1/2$  are mainly governed by a transient zero-field-splitting mechanism (ZFS). The ZFS term is expressed by Equations (12) and (13), where  $\Delta^2$  is the trace of the square of the transient zero-field-splitting tensor,  $\tau_v$  is the correlation time for the modulation of the ZFS with the activation energy  $E_v$ , and  $\omega_s$  is the Larmor frequency of the electron spin:

$$\left(\frac{1}{T_{1e}}\right)^{ZFS} = \frac{1}{25} \Delta^2 \tau_v \{4S(S+1) - 3\} \left(\frac{1}{1 + \omega_s^2 \tau_v^2} + \frac{4}{1 + 4\omega_s^2 \tau_v^2}\right) \quad (12)$$

$$\left(\frac{1}{T_{2e}}\right)^{ZFS} = \Delta^2 \tau_v \left[\frac{5.26}{1 + 0.372\omega_s^2 \tau_v^2} + \frac{7.18}{1 + 1.24\omega_s^2 \tau_v^2}\right] \quad (13)$$

$$\tau_v = \tau_v^{298} \exp\left\{\frac{E_v}{R}\left(\frac{1}{T} - \frac{1}{298.15}\right)\right\} \quad (14)$$

In the fit of  $^{17}\text{O}$  NMR, EPR and NMRD data on  $[\text{Gd}(\text{DTTA-Nprop})(\text{H}_2\text{O})]^{2-}$  and  $[\text{Gd}(\text{EPTPA-BBA})(\text{H}_2\text{O})]$ , the electron spin relaxation has been described by the Rast-Borel theory. Details of this have been published in Alain Borel, Lothar Helm, André E. Merbach, *Molecular Dynamics of Gd(III) Complexes in Aqueous Solution by HF EPR in Very High Frequency (VHF) ESR/EPR Biological Magnetic Resonance*, Chapter 6, Vol. 22, pp 207-247, Ed. L.J. Berliner, Plenum Press, New York, 2002.

**NMRD.** The measured proton relaxivities (normalized to 1 mM  $\text{Gd}^{3+}$  concentration) contain both inner and outer sphere contributions:

$$r_1 = r_{\text{is}} + r_{\text{os}} \quad (15)$$

The inner sphere term is given by Equation (16), where  $q$  is the number of inner sphere water molecules.

$$r_{\text{is}} = \frac{1}{1000} \times \frac{q}{55.55} \times \frac{1}{T_{1\text{m}}^{\text{H}} + \tau_{\text{m}}} \quad (16)$$

The longitudinal relaxation rate of inner sphere protons,  $1/T_{1\text{m}}^{\text{H}}$  is expressed:

$$\frac{1}{T_{1\text{m}}^{\text{H}}} = \frac{2}{15} \left( \frac{\mu_0}{4\pi} \right)^2 \frac{\hbar^2 \gamma_{\text{S}}^2 \gamma_{\text{I}}^2}{r_{\text{GdH}}^6} S(S+1) \left[ \frac{3\tau_{\text{d1H}}}{1 + \omega_1^2 \tau_{\text{d1H}}^2} + \frac{7\tau_{\text{d2H}}}{1 + \omega_{\text{S}}^2 \tau_{\text{d2H}}^2} \right] \quad (17)$$

Here  $r_{\text{GdH}}$  is the effective distance between the  $\text{Gd}^{3+}$  electron spin and the water protons,  $\omega_1$  is the proton resonance frequency and  $\tau_{\text{d1H}}$  is given by Equation (18), where  $\tau_{\text{RH}}$  is the rotational correlation time of the  $\text{Gd}^{3+}$ - $\text{H}_{\text{water}}$  vector:

$$\frac{1}{\tau_{\text{d1H}}} = \frac{1}{\tau_{\text{m}}} + \frac{1}{\tau_{\text{RH}}} + \frac{1}{T_{\text{ie}}} \quad i = 1, 2 \quad (18)$$

The outer sphere contribution is described by Equation (19), where  $N_{\text{A}}$  is the Avogadro constant, and  $J_{\text{os}}$  is a spectral density function.

$$r_{\text{os}} = \frac{32 N_{\text{A}} \pi}{405} \left( \frac{\mu_0}{4\pi} \right)^2 \frac{\hbar^2 \gamma_{\text{S}}^2 \gamma_{\text{I}}^2}{a_{\text{GdH}} D_{\text{GdH}}} S(S+1) [3J_{\text{os}}(\omega_1, T_{1\text{e}}) + 7J_{\text{os}}(\omega_{\text{S}}, T_{2\text{e}})] \quad (19)$$

$$J_{\text{os}}(\omega, T_{\text{je}}) = \text{Re} \left[ \frac{1 + \frac{1}{4} \left( i\omega\tau_{\text{GdH}} + \frac{\tau_{\text{GdH}}}{T_{\text{je}}} \right)^{1/2}}{\left[ 1 + \left( i\omega\tau_{\text{GdH}} + \frac{\tau_{\text{GdH}}}{T_{\text{je}}} \right)^{1/2} \right]^2 + \frac{4}{9} \left( i\omega\tau_{\text{GdH}} + \frac{\tau_{\text{GdH}}}{T_{\text{je}}} \right) + \frac{1}{9} \left( i\omega\tau_{\text{GdH}} + \frac{\tau_{\text{GdH}}}{T_{\text{je}}} \right)^{3/2}} \right] \quad (20)$$

$j = 1, 2$

For the temperature dependence of the diffusion coefficient for the diffusion of a water proton away from a  $\text{Gd}^{3+}$  complex,  $D_{\text{GdH}}$ , we assume an exponential temperature dependence, with an activation energy  $E_{\text{DGdH}}$ :

$$D_{\text{GdH}} = D_{\text{GdH}}^{298} \exp\left\{\frac{E_{\text{DGdH}}}{R} \left(\frac{1}{T} - \frac{1}{298.15}\right)\right\} \quad (2)$$
